# Supplementary material for: Nanostructure stabilization by low-temperature dopant pinning in multiferroic BiFeO3-based thin films produced by aqueous chemical solution deposition
Source: Royal Society of Chemistry journal article supplement (doi:10.1039/c9tc05912a), 2020-01-01
Supplement: c9tc05912a1.pdf [file c9tc05912a1.pdf]

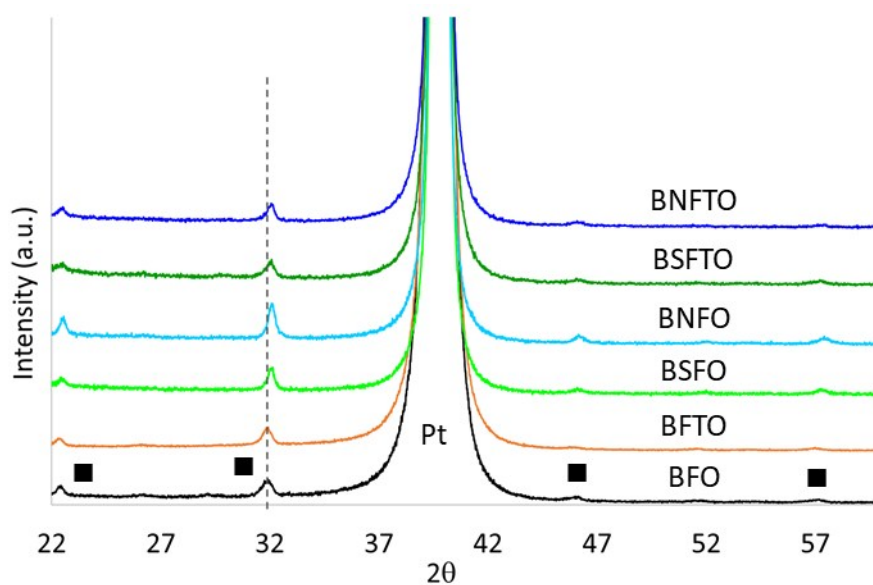

**Figure S1.** Normalised XRD patterns for the six compositions under study right after the crystallization of the films at 600°C/1h. Squares are assigned to the  $R_{3c}$  BiFeO<sub>3</sub> phase, while Pt stands for the platinum peak of the substrate. The grey dashed line around  $2\theta = 32$  shows the displacement of the peaks upon doping.
