# Supplementary material for: Nanostructure stabilization by low-temperature dopant pinning in multiferroic BiFeO3-based thin films produced by aqueous chemical solution deposition
Source: Royal Society of Chemistry journal article supplement (doi:10.1039/c9tc05912a), 2020-01-01
Supplement: c9tc05912a2.pdf [file c9tc05912a2.pdf]

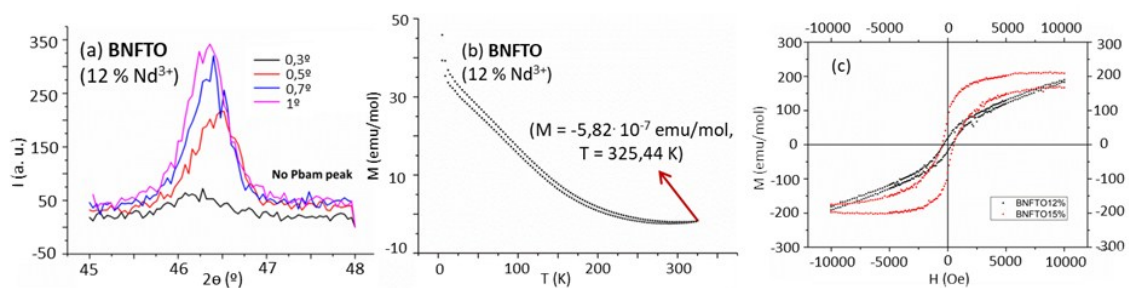

**Figure S2.** Synthesis and characterization of a BNFTO thin film with a nominal composition containing a smaller amount of neodymium: 12 mol % of  $\text{Nd}^{3+}$ ,  $\text{Bi}_{0.85}\text{Nd}_{0.12}\text{FeO}_3$ . This has been formulated to fall outside the postulated MPB (morphotropic phase boundary) and, consequently, no presence of the *Pbam* phase is ever detected on the GID-XRD analyses (nor even at the lowest incidence angle of  $0.3^\circ$ ). The thermal dependence of the magnetization upon ZFC and FC conditions also evidence no structural transitions and the corresponding M-H hysteresis loops report a much lower remnant magnetization for this composition.
